# Supplementary material for: Syntheses and Characterization of Novel Perovskite-Type LaScO3-Based Lithium Ionic Conductors
Source: MDPI journal article supplement (doi:10.3390/molecules26020299), 2021-01-08
Supplement: s1 [file s1]

## *Supporting Information*

# **High-Pressure Syntheses, Structures, and Ionic Conductivities of Perovskite-type LaScO<sub>3</sub>-Based Lithium Ionic Conductors**

**Guowei Zhao<sup>1</sup>, Kota Suzuki<sup>2,3</sup>, Masaaki Hirayama<sup>2</sup> and Ryoji Kanno<sup>1,2,\*</sup>**

<sup>1</sup> All-Solid-State Battery Unit, Institute of Innovation Research, Tokyo Institute of Technology, 4259 Nagatsuta, Midori-ku, Yokohama 226-8502, Japan

<sup>2</sup> Department of Chemical Science and Engineering, School of Materials and Chemical Technology, Tokyo Institute of Technology, 4259 Nagatsuta, Midori-ku, Yokohama 226-8502, Japan

<sup>3</sup> Precursory Research for Embryonic Science and Technology (PRESTO), Japan Science and Technology Agency (JST), 4-1-8 Honcho Kawaguchi-shi, Saitama, 332-0012, Japan

\* Correspondence: Correspondence: kanno@echem.titech.ac.jp; Tel.: +81-45-924-5401

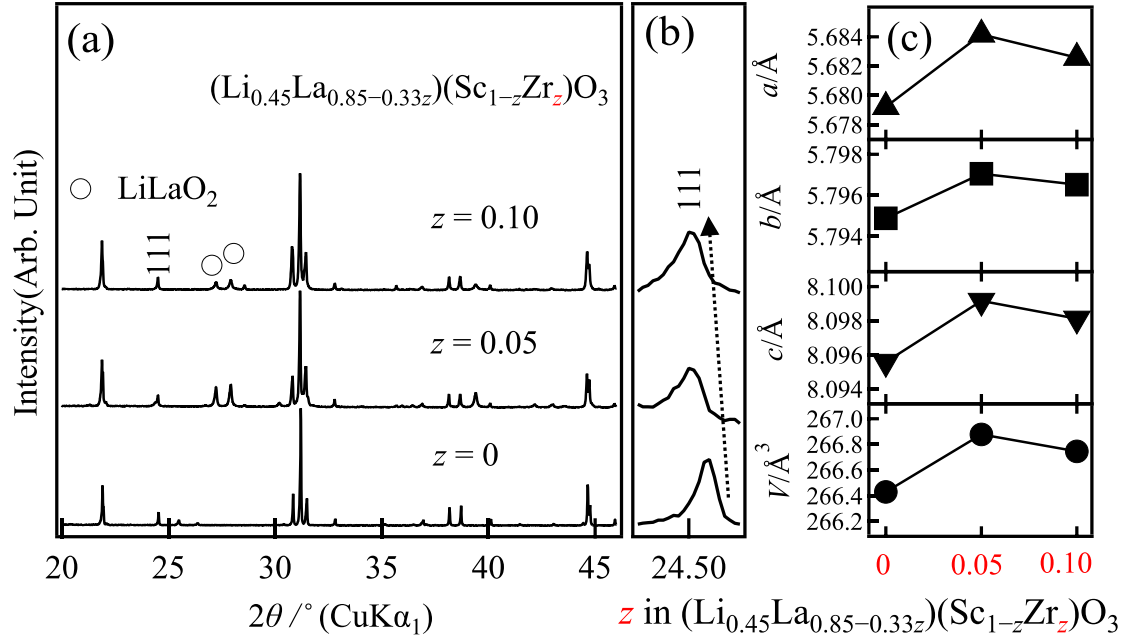

**Figure S1.** (a) X-ray diffraction patterns, (b) observed shifts of the selected reflections, and (c) variation in the lattice parameters with the composition of  $(\text{Li}_{0.45}\text{La}_{0.85-0.33z})(\text{Sc}_{1-z}\text{Zr}_z)\text{O}_3$  ( $y = 0$  and  $0.1$ ).

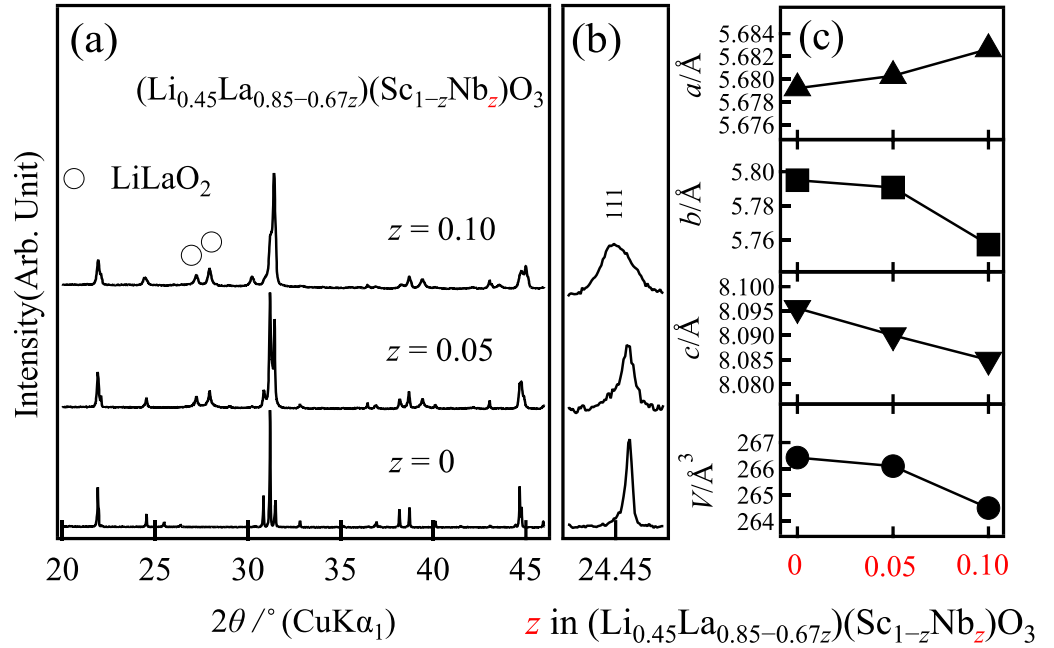

**Figure S2.** (a) X-ray diffraction patterns, (b) observed shifts of the selected reflections, and (c) variation in the lattice parameters with the composition of  $(\text{Li}_{0.45}\text{La}_{0.85-0.67z})(\text{Sc}_{1-z}\text{Nb}_z)\text{O}_3$  ( $z = 0$  and  $0.1$ ).

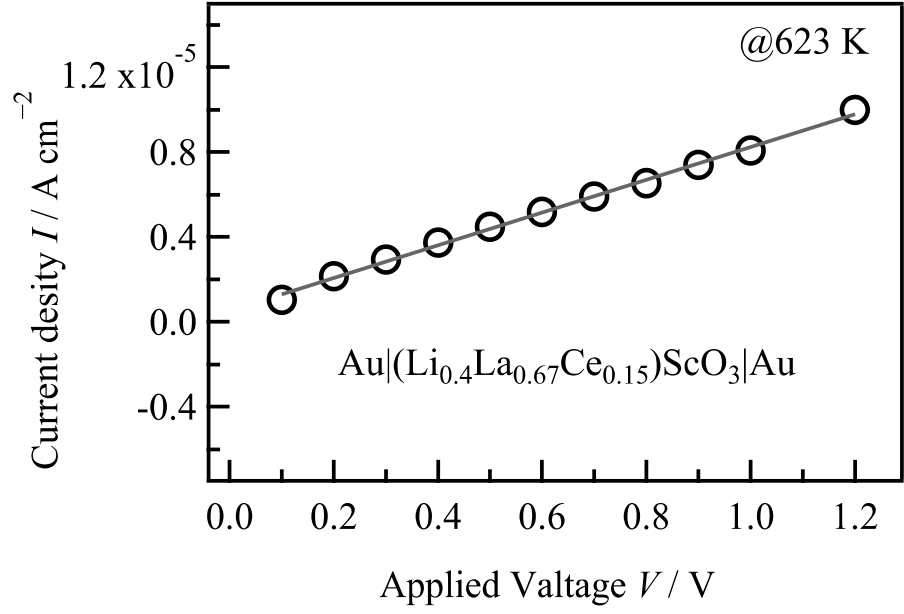

**Figure S3.** Steady-state current as a function of the applied voltage at 623 K in dry Ar atmosphere for  $(Li_{0.4}La_{0.67}Ce_{0.15})ScO_3$ .

The chemical compositions of  $(Li_{0.45}La_{0.85})ScO_3$  and  $(Li_{0.45}La_{0.78}Ce_{0.05})ScO_3$  (Table S1), determined by inductively coupled plasma atomic emission spectroscopy (ICP-AES: Shi-madzu, ICPS-8100), were comparable to the nominal values.

**Table S1.** Chemical compositions of  $(Li_{0.45}La_{0.85})ScO_3$  and  $(Li_{0.45}La_{0.78}Ce_{0.05})ScO_3$ .

|         | Li       | La       | Ce       | Sc       |
|---------|----------|----------|----------|----------|
| Nominal | 0.45     | 0.85     | –        | 1        |
| ICP-AES | 0.193(2) | 0.924(4) | –        | 0.954(3) |
| Nominal | 0.45     | 0.78     | 0.05     | 1        |
| ICP-AES | 0.463(4) | 0.746(3) | 0.042(5) | 0.983(2) |
